# Supplementary material for: Unravelling the correlation of dielectric barrier discharge power and performance of Pt/CeO2catalysts for toluene oxidation
Source: Royal Society of Chemistry journal article supplement (doi:10.1039/d2cy01736a), 2022-12-08
Supplement: d2cy01736a1.pdf [file d2cy01736a1.pdf]

## Supplementary Information

### Unraveling the correlation of dielectric barrier discharge power and performance of Pt/CeO<sub>2</sub> catalyst for toluene oxidation

Bangfen Wang<sup>\*a</sup>, Xiufeng Li<sup>a</sup>, Yuhai Sun<sup>c</sup>, Hailin Xiao<sup>b</sup>, Mingli Fu<sup>b</sup>, Shuhua Li<sup>a</sup>, Hong Liang<sup>a</sup>, Zhiwei Qiao<sup>a</sup>, Daiqi Ye<sup>\*b</sup>

<sup>a</sup> Guangzhou Key Laboratory for New Energy and Green Catalysis, School of Chemistry and Chemical Engineering, Guangzhou University, Guangzhou 510006, China

<sup>b</sup> National Engineering Laboratory for VOCs Pollution Control Technology and Equipment, School of Environment and Energy, South China University of Technology, Guangzhou 510006, China

<sup>c</sup> School of Environmental Science and Engineering, Zhejiang Gongshang University, Hangzhou 310018, China

(\*) Corresponding author: E-mail: [bwang@gzhu.edu.cn](mailto:bwang@gzhu.edu.cn); [cedqye@scut.edu.cn](mailto:cedqye@scut.edu.cn)

#### CO-pulse chemisorption

Static CO-pulse chemisorption was used to evaluate the metal dispersion and particle size of Pt on CeO<sub>2</sub> by Micromeritics AutoChem II 2920. A 100 mg samples were pre-reduced at 300 °C for 3 h in 10% H<sub>2</sub>/Ar flow (30 ml min<sup>-1</sup>). After the subsequent temperature was cooled to 30 °C under Ar flow (30 ml min<sup>-1</sup>), and then 10% CO/Ar pulse stream was periodically injected until the adsorption reached the saturation of the catalysts. Then, the dispersion (D<sub>2Pt</sub>) and particle size (d<sub>2Pt</sub>) of the Pt nanoparticles (NPs) were evaluated by Eq. (S1) and (S2).

$$d_{2Pt} = \frac{60X_{Pt}}{\rho_{Pt}S_{Pt}} \quad (S1)$$

$$D_{2Pt} = \frac{10S_{Pt}M_{Pt}}{X_{Pt}\alpha_{Pt}N_A} \quad (S2)$$

where  $X_{Pt}$  the amount of Pt loaded (%),  $M_{Pt}$  the molar weight of Pt (195.08 g mol<sup>-1</sup>),  $\rho_{Pt}$  the density of Pt (21.45 g cm<sup>-3</sup>),  $\alpha_{Pt}$  the cross-sectional area of Pt atoms ( $8.06 \times 10^{-20}$  m<sup>2</sup> atom<sup>-1</sup>),  $N_A$  Avogadro constant ( $6.019 \times 10^{23}$  atom mol<sup>-1</sup>) and  $S_{Pt}$  the surface area of Pt relative to the sample obtained from CO pulse chemisorption (m<sup>2</sup> g<sup>-1</sup>). The stoichiometric ratio of CO and the Pt atom was set as 1:1.

Table S1 Particle size and dispersion

| Catalysts               | <sup>f</sup> Pt particle size (nm) | <sup>f</sup> Dispersion (%) |
|-------------------------|------------------------------------|-----------------------------|
| Pt/CeO <sub>2</sub>     | 3.32                               | 33.85                       |
| Pt/CeO <sub>2</sub> -P1 | 3.18                               | 35.41                       |
| Pt/CeO <sub>2</sub> -P2 | 3.04                               | 37.05                       |
| Pt/CeO <sub>2</sub> -P3 | 3.05                               | 36.84                       |
| Pt/CeO <sub>2</sub> -P4 | 3.25                               | 34.58                       |
| Pt/CeO <sub>2</sub> -P5 | 3.48                               | 32.33                       |
| Pt/CeO <sub>2</sub> -P6 | 3.31                               | 33.94                       |
| Pt/CeO <sub>2</sub> -P7 | 3.07                               | 36.65                       |
| Pt/CeO <sub>2</sub> -P8 | 4.14                               | 27.20                       |

<sup>f</sup>Diameter of the loading Pt NPs measured by CO chemisorption, conducted at 303 K.

### O<sub>2</sub>-pulse chemisorption

Through saturated O<sub>2</sub> chemisorption at room temperature, the consumption of O ( $OSC_{Catal}$ ) was directly obtained, and the consumption of Pt ( $OSC_{Pt}$ ) was calculated based on Eq. (S3). The stoichiometric ratio of O and the metal atom was set as 2:1. And the surface oxygen vacancy concentration ( $OSC_{Surf}$ ) was calculated by Eq. (S4). (the calculations shown in table S2)

$$OSC_{Pt} = \frac{2D_{Pt}X_{Pt}}{M_{Pt}}10^2 \quad (S3)$$

$$OSC_{Surf} = OSC_{Catal} - OSC_{Pt} \quad (S4)$$

where  $X_{Pt}$ ,  $M_{Pt}$  are the same meaning prementioned. And before the measurement, all catalysts were pre-reduced under 10% H<sub>2</sub>/Ar at 300 °C for 3 h.

Table S2 Relative concentration of OSC from O<sub>2</sub> chemisorption

| Catalysts               | $OSC_{Pt}$ (μmol O g <sup>-1</sup> ) | $OSC_{Surf}$ (μmol O g <sup>-1</sup> ) |
|-------------------------|--------------------------------------|----------------------------------------|
| Pt/CeO <sub>2</sub>     | 28                                   | 176                                    |
| Pt/CeO <sub>2</sub> -P1 | 27                                   | 179                                    |
| Pt/CeO <sub>2</sub> -P2 | 28                                   | 183                                    |
| Pt/CeO <sub>2</sub> -P3 | 28                                   | 180                                    |
| Pt/CeO <sub>2</sub> -P4 | 27                                   | 162                                    |
| Pt/CeO <sub>2</sub> -P5 | 24                                   | 185                                    |
| Pt/CeO <sub>2</sub> -P6 | 25                                   | 189                                    |
| Pt/CeO <sub>2</sub> -P7 | 30                                   | 170                                    |
| Pt/CeO <sub>2</sub> -P8 | 21                                   | 182                                    |

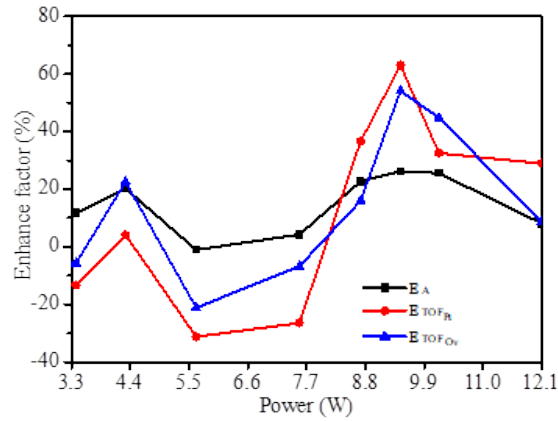

Figure S1 Relationship between  $T_{90}$ ,  $TOF_{Pt}$  and  $TOF_{Ov}$  and varying discharge power

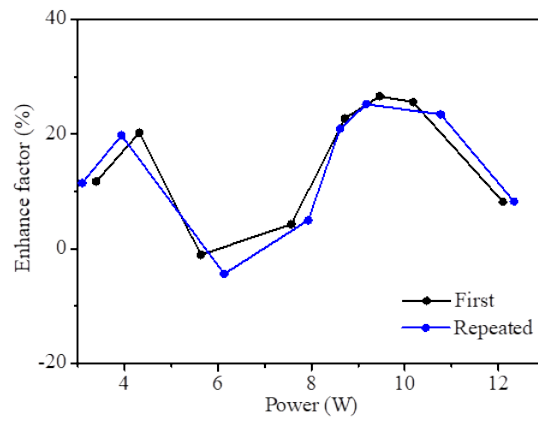

Figure S2 Activity evaluation of repeated experiment

The catalytic activities had been repeated for fresh samples which were re-prepared and treated by plasma with various discharge power to verify before drawing a conclusion. There are differences in the various discharge power, the reason that it is difficult to control the discharge power staying at the same power point due to the catalyst material and DBD discharge properties. But the Pt/CeO<sub>2</sub> catalyst's activity ( $T_{90}$ ) shown the similar trends with increasing discharge power.

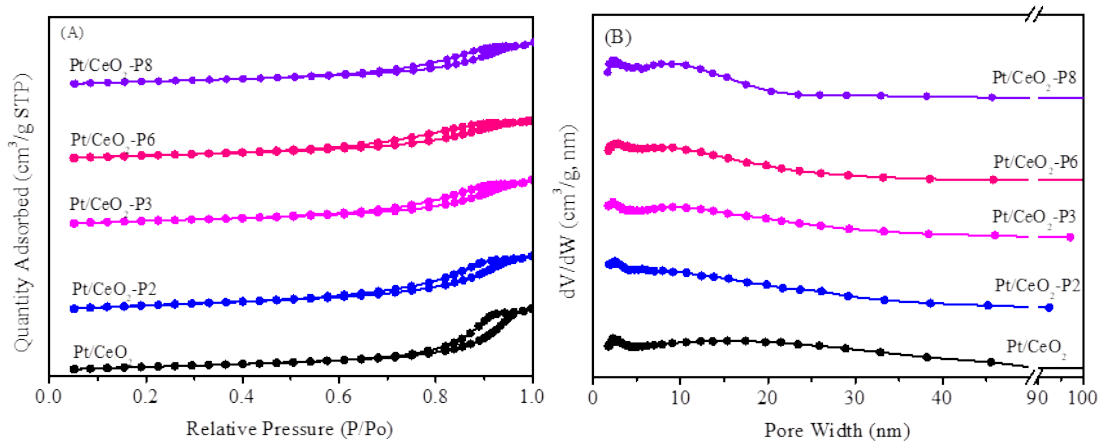

Figure S3 N<sub>2</sub> adsorption-desorption (A) and pore size distributions (B) of all samples

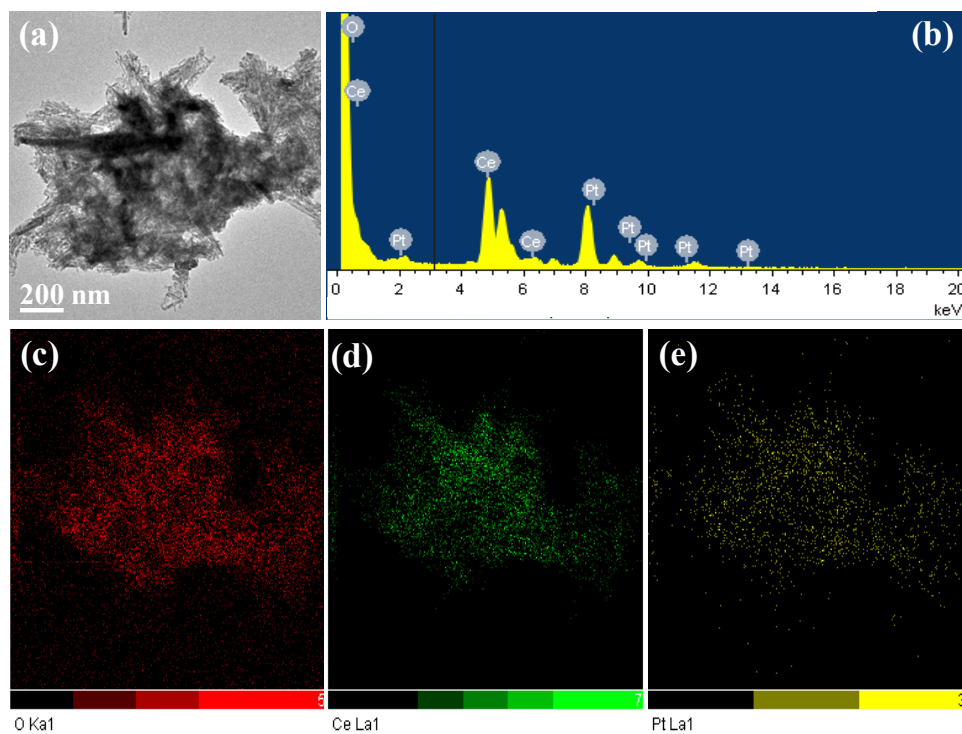

Figure S4 EDX mapping of Pt/CeO<sub>2</sub> catalyst (STEM image (a) and elemental (b) with corresponding distribution of O (c), Ce (d) and Pt (e) elements)

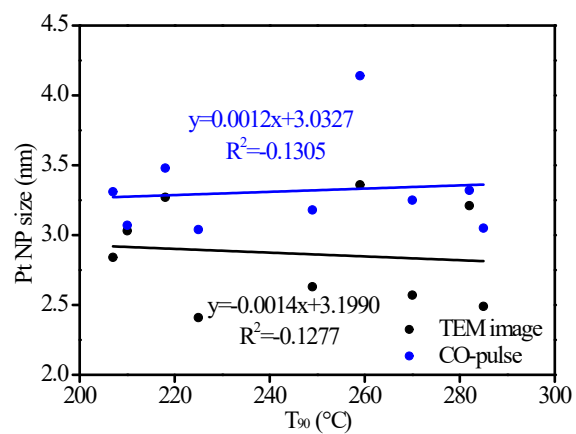

Figure S5 Relationship between activity and Pt NP size for all catalysts

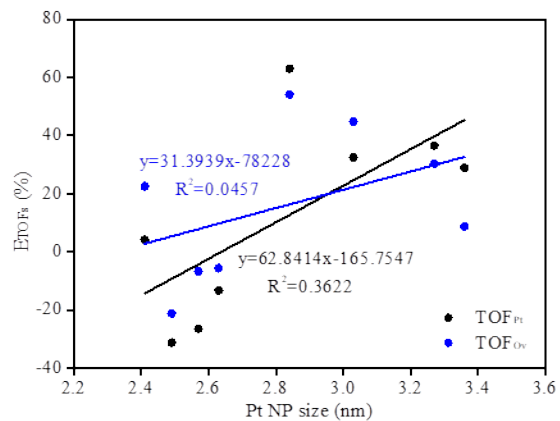

Figure S6 Relationship between Pt NP size and TOFs for all catalysts

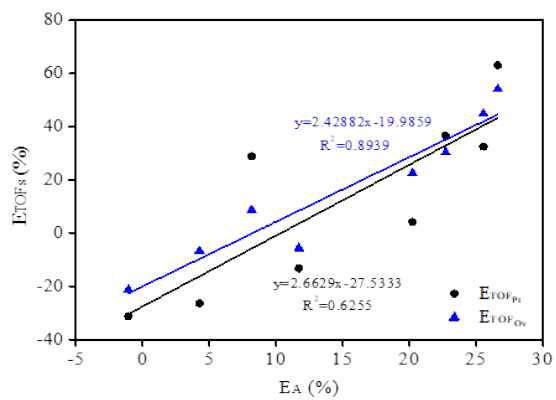

Figure S7 Relationship between activity and TOFs (TOF<sub>Pt</sub> and TOF<sub>Ov</sub>) for all catalysts by plasma treatment with various discharge power
